# Supplementary material
Source: PubMed Central journal article supplement (PMC5960959)
Supplement: AEM.02455-17_zam011188523s1.pdf [file AEM.02455-17_zam011188523s1.pdf]

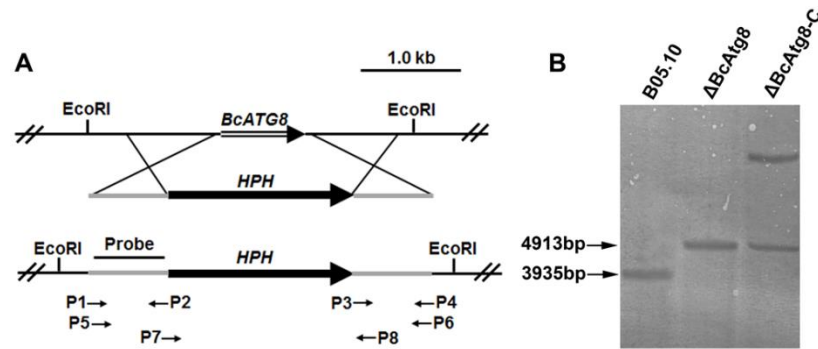

**Fig. S1** Generation and identification of *BcATG8* gene deletion mutant. (A) Schematic diagram of the *BcATG8* gene replacement strategy. (B) Southern blot hybridization analysis of EcoRI-digested genomic DNA of the wild-type strain B05.10, the *BcATG8* deletion mutant  $\Delta$ BcAtg8 and complemented strain  $\Delta$ BcAtg8-C using the upstream fragment of *BcATG8* as a probe.

**Table S1. Autophagy-related genes in *Botrytis cinerea***

| <i>Saccharomyces cerevisiae</i> |         | <i>B. cinerea</i> |
|---------------------------------|---------|-------------------|
| Protein                         | Gene    | Gene              |
| Atg1                            | YGL180W | BC1G_05432        |
| Atg2                            | YNL242W | BC1G_09010        |
| Atg3                            | YNR007C | BC1G_08793        |
| Atg4                            | YNL223W | BC1G_11320        |
| Atg6                            | YPL120W | BC1G_01844        |
| Atg7                            | YHR171W | BC1G_09811        |
| Atg8                            | YBL078C | BC1G_02467        |
| Atg9                            | YDL149W | BC1G_15751        |
| Atg11                           | YPR049C | BC1G_03242        |
| Atg15                           | YCR068W | BC1G_07555        |
| Atg17                           | YLR423C | BC1G_11270        |
| Atg18                           | YFR021W | BC1G_12821        |
| Atg21                           | YPL100W | BC1G_12821        |
| Atg22                           | YCL038C | BC1G_07239        |
| Atg23                           | YLR431C | BC1G_09995        |
| Atg24                           | YJL036W | BC1G_01500        |
| Atg26                           | YLR189C | BC1G_12424        |

|       |         |            |
|-------|---------|------------|
| Atg33 | YLR356W | BC1G_00142 |
| Irs4  | YKR019C | BC1G_09584 |
| Tax4  | YJL083W | BC1G_09584 |
| Tor1  | YJR066W | BC1G_11880 |
| Tor2  | YKL203C | BC1G_11880 |
| Mon1  | YGL124C | BC1G_02219 |
| Sec17 | YBL050W | BC1G_12159 |
| Sec18 | YBR080C | BC1G_01819 |

Homologues were identified through BLAST searches of the *B. cinerea* genome database (<http://www.broadinstitute.org>) using the *S. cerevisiae* Atg proteins (<http://www.yeastgenome.org>) as a query. Sequences of the best hit with an E-value <  $10^{-6}$  are shown as candidates.

**Table S2** The lipid metabolism related genes in *Botrytis cinerea*.

| Code     | Gene locus | Putative function                                            | Ortholog in <i>Saccharomyces cerevisiae</i> |
|----------|------------|--------------------------------------------------------------|---------------------------------------------|
| <b>A</b> | BC1G_13009 | Phosphatidic acid phosphohydrolase                           | Pah1                                        |
| <b>B</b> | BC1G_11851 | Diacylglycerol acyltransferase                               | Dga1                                        |
| <b>C</b> | BC1G_10262 | Acyl-coenzyme A: cholesterol acyl transferase-related enzyme | Are1                                        |
| <b>D</b> | BC1G_07580 | Lipid droplet hydrolase                                      | Ldh1                                        |
| <b>E</b> | BC1G_03357 | Triacylglycerol lipase                                       | Tgl3                                        |
| <b>F</b> | BC1G_12236 | 1-Acyldihydroxyacetone-phosphate reductase                   | Ayr1                                        |
| <b>G</b> | BC1G_09602 | Triglyceride Lipase                                          | Tgl1                                        |
| <b>H</b> | BC1G_07986 | Steryl ester hydrolase                                       | Yeh2                                        |
